# Supplementary material for: Satisfaction with quality of ICU care for patients and families: the euroQ2 project
Source: Springer Nature journal article supplement (doi:10.1186/s13054-017-1826-7), 2017-09-07
Supplement: MOESM2 [file 15029406]

## Supplementary material 2

### 2. Description of statistical analyses

### 3. Supplementary tables

### 2. Description of statistical analyses

Testing involved four phases. In Phase 1, we divided the 20 euroFS-ICU items into four groups *a priori*, placing each item into one of the conceptual domains. Phase 2 involved a series of EFA models based on the merged European data. Beginning with the 20-indicator conceptual model, at each step we eliminated one item from the previous model until acceptable fit was obtained. In the first several steps, we selected for removal the variable that made the largest contribution to modification indices; in later steps we also eliminated variables that exhibited low loadings on their primary hypothesized factor (less than 0.63, based on *a priori* criterion for “very good” indicators) (1). A judgment of acceptable fit required that a model show statistically non-significant misfit ( $p$ -value  $>0.05$ ) for the  $\chi^2$  test of fit (2).

Phase 3 involved doing within-country tests of the final model obtained in Phase 2. In Phase 4 we used E/CFA to assess whether there was a confirmatory factor analysis (CFA) model that provided acceptable fit to the merged data, and – if so – whether that model exhibited scalar measurement invariance (i.e., equivalent indicator loadings and thresholds) between the two countries. The CFA model was required in order to establish whether each of the component factors was a “pure” domain (with each indicator contributing to only one of the domains), thus providing support for computation of domain scores that relied exclusively on the responses to items constituting the domain. A demonstration of scalar measurement invariance was required as evidence that the multi-item constructs had equivalent meaning between countries, a prerequisite for making legitimate between-country comparisons on mean levels of the constructs (3;4).

In all EFA, E/CFA and CFA models, we defined the euroFS-ICU items as ordered categorical variables. Family members were clustered under patients to account for the non-independence of respondents. Model estimation was done with a weighted least squares estimator with mean and variance adjustment (WLSMV).

- (1) Comrey AL, Lee HB. *A First Course in Factor Analysis*. 2nd. ed. Hillsdale, NJ: 1992.
- (2) Hayduk L, Cummings G, Boadu K, Pazderka-Robinson H, Boulianne S. Testing! testing! one, two, three -- Testing the theory in structural equation models! *Personality and Individual Differences* 2007;42:841-50.
- (3) Meredith W, Teresi JA. An essay on measurement and factorial invariance. *Med Care* 2006 Nov;44(11 Suppl 3):S69-S77.
- (4) Milfont TL, Fischer F. Testing measurement invariance across groups: applications in cross-cultural research. *International Journal of Psychological Research* 2010;3(1):111-21.

### 3. Supplementary tables

**Table S1a. Unadjusted Associations between Respondent Characteristics and Separate Family Satisfaction Items, Part 1<sup>a</sup>**

| Outcome                                  | Netherlands    |        |              | PREDICTOR      |                  |              | Female         |        |              |
|------------------------------------------|----------------|--------|--------------|----------------|------------------|--------------|----------------|--------|--------------|
|                                          | n <sup>c</sup> | b      | p            | n <sup>c</sup> | Age <sup>b</sup> | p            | n <sup>c</sup> | b      | p            |
| Concern and caring toward patient        | 1070/915       | -0.545 | <b>0.000</b> | 1053/904       | 0.004            | 0.142        | 1054/904       | 0.124  | 0.113        |
| Pain management                          | 1008/864       | -0.542 | <b>0.000</b> | 990/850        | 0.003            | 0.211        | 991/850        | 0.165  | <b>0.041</b> |
| Breathlessness management                | 928/797        | -0.606 | <b>0.000</b> | 913/786        | -0.004           | 0.109        | 914/786        | 0.164  | <b>0.044</b> |
| Agitation management                     | 970/840        | -0.431 | <b>0.000</b> | 956/829        | 0.005            | <b>0.031</b> | 957/829        | 0.028  | 0.739        |
| Atmosphere of the ICU                    | 1075/920       | -0.348 | <b>0.000</b> | 1053/906       | 0.006            | <b>0.020</b> | 1054/906       | 0.100  | 0.206        |
| Consideration of family needs            | 1066/913       | -0.317 | <b>0.000</b> | 1044/899       | 0.004            | 0.077        | 1045/899       | 0.132  | 0.084        |
| Emotional support                        | 1034/889       | -0.344 | <b>0.000</b> | 1012/875       | 0.008            | <b>0.001</b> | 1013/875       | 0.086  | 0.271        |
| Opportunity to be present at bedside     | 1076/920       | -0.294 | <b>0.000</b> | 1054/906       | 0.006            | <b>0.023</b> | 1055/906       | 0.055  | 0.485        |
| Ease of getting information              | 1071/915       | -0.392 | <b>0.000</b> | 1049/901       | 0.002            | 0.396        | 1050/901       | 0.160  | <b>0.039</b> |
| Understanding of information             | 1070/914       | -0.248 | <b>0.001</b> | 1049/901       | 0.000            | 0.875        | 1050/901       | 0.186  | <b>0.014</b> |
| Honesty of information                   | 1070/914       | -0.474 | <b>0.000</b> | 1049/901       | 0.002            | 0.465        | 1050/901       | 0.064  | 0.411        |
| Completeness of Information              |                |        |              |                |                  |              |                |        |              |
| What was happening                       | 1065/910       | -0.358 | <b>0.000</b> | 1044/896       | 0.005            | 0.050        | 1045/896       | 0.050  | 0.505        |
| Why things were being done               | 1063/908       | -0.428 | <b>0.000</b> | 1042/895       | 0.001            | 0.543        | 1043/895       | 0.066  | 0.392        |
| Consistency of information               | 1057/906       | -0.352 | <b>0.000</b> | 1036/893       | 0.005            | <b>0.017</b> | 1037/893       | 0.046  | 0.539        |
| Overall quality of information           |                |        |              |                |                  |              |                |        |              |
| By doctors                               | 1045/898       | -0.207 | <b>0.004</b> | 1024/885       | 0.005            | 0.052        | 1025/885       | 0.013  | 0.860        |
| By nurses                                | 1067/913       | -0.566 | <b>0.000</b> | 1046/900       | 0.002            | 0.308        | 1047/900       | 0.112  | 0.138        |
| Inclusion in decision-making processes   | 906/793        | -0.118 | 0.106        | 885/779        | 0.002            | 0.516        | 886/779        | -0.007 | 0.927        |
| Support during decision-making processes | 839/734        | -0.319 | <b>0.000</b> | 818/720        | -0.002           | 0.493        | 819/720        | 0.014  | 0.864        |
| Adequate time to have concerns addressed | 776/686        | 0.209  | 0.094        | 757/673        | 0.003            | 0.484        | 757/673        | -0.033 | 0.804        |
| Overall satisfaction with patient care   | 1060/906       | -0.532 | <b>0.000</b> | 1039/893       | 0.007            | <b>0.004</b> | 1040/893       | 0.093  | 0.240        |

a All associations were tested with clustered single-predictor probit regression models (respondents nested under patients; outcomes defined as ordered categorical variables) estimated with weighted least squares with mean and variance adjustment (WLSMV). *P*-values (statistically significant values presented in boldface) were based on Wald's test.

b Age was modeled as a continuous variable.

c Sample with valid cases is presented as #respondents/#patients.

**Table S1b. Unadjusted Associations between Respondent Characteristics and Separate Family Satisfaction Items, Part 2<sup>a</sup>**

| Outcome                                  | n <sup>b</sup> | Relationship |            |              |             |               |             |            | p     |
|------------------------------------------|----------------|--------------|------------|--------------|-------------|---------------|-------------|------------|-------|
|                                          |                | Spouse<br>b  | Child<br>b | Sibling<br>b | Parent<br>b | Relative<br>b | Friend<br>b | Other<br>b |       |
| Concern and caring toward patient        | 1059/909       | 0.000        | -0.088     | -0.039       | 0.017       | -0.266        | -0.407      | -0.086     | 0.691 |
| Pain management                          | 996/855        | 0.000        | -0.095     | 0.002        | 0.040       | -0.038        | -0.363      | 0.152      | 0.780 |
| Breathlessness management                | 919/791        | 0.000        | 0.047      | 0.180        | 0.132       | 0.071         | -0.343      | 0.100      | 0.785 |
| Agitation management                     | 962/834        | 0.000        | -0.078     | 0.045        | 0.079       | -0.060        | -0.282      | -0.012     | 0.891 |
| Atmosphere of the ICU                    | 1059/911       | 0.000        | -0.069     | -0.084       | -0.095      | -0.338        | -0.297      | -0.153     | 0.714 |
| Consideration of family needs            | 1050/904       | 0.000        | -0.052     | -0.032       | -0.112      | -0.252        | -0.840      | -0.142     | 0.096 |
| Emotional support                        | 1018/880       | 0.000        | -0.144     | -0.197       | 0.063       | -0.135        | -0.493      | 0.149      | 0.253 |
| Opportunity to be present at bedside     | 1060/911       | 0.000        | -0.110     | 0.026        | -0.012      | -0.315        | -0.230      | -0.228     | 0.573 |
| Ease of getting information              | 1055/906       | 0.000        | 0.080      | -0.047       | 0.271       | 0.099         | -0.037      | -0.152     | 0.538 |
| Understanding of information             | 1055/906       | 0.000        | 0.050      | -0.061       | 0.392       | 0.050         | 0.027       | 0.180      | 0.245 |
| Honesty of information                   | 1055/906       | 0.000        | -0.003     | -0.169       | 0.313       | -0.157        | 0.002       | 0.068      | 0.396 |
| Completeness of Information              |                |              |            |              |             |               |             |            |       |
| What was happening                       | 1050/901       | 0.000        | -0.060     | -0.154       | 0.230       | -0.238        | -0.128      | 0.012      | 0.479 |
| Why things were being done               | 1048/900       | 0.000        | -0.029     | 0.060        | 0.203       | -0.085        | -0.419      | 0.352      | 0.309 |
| Consistency of information               | 1042/898       | 0.000        | -0.035     | -0.092       | 0.173       | 0.209         | -0.143      | 0.410      | 0.464 |
| Overall quality of information           |                |              |            |              |             |               |             |            |       |
| By doctors                               | 1030/890       | 0.000        | -0.069     | -0.006       | 0.350       | 0.050         | -0.603      | -0.109     | 0.081 |
| By nurses                                | 1052/905       | 0.000        | -0.055     | 0.001        | 0.155       | 0.002         | -0.339      | 0.170      | 0.712 |
| Inclusion in decision-making processes   | 890/783        | 0.000        | 0.016      | 0.035        | 0.167       | -0.049        | -0.414      | 0.329      | 0.611 |
| Support during decision-making processes | 823/724        | 0.000        | 0.022      | 0.081        | 0.091       | 0.153         | -0.458      | 0.275      | 0.708 |
| Adequate time to have concerns addressed | 761/677        | 0.000        | 0.012      | -0.067       | 0.364       | 0.427         | -0.376      | 0.002      | 0.851 |
| Overall satisfaction with patient care   | 1045/898       | 0.000        | -0.056     | 0.069        | 0.172       | -0.083        | -0.048      | -0.142     | 0.843 |

- a Associations were tested with clustered six-predictor probit regression models (respondents nested under patients; outcomes defined as ordered categorical variables; six dummy indicators for relationship, with spousal relationship as the reference category). Coefficient estimates were based on weighted least squares with mean and variance adjustment (WLSMV), and *P*-values (statistically significant values presented in boldface) were based on a Wald test for the combined relationships.
- b Sample with valid cases is presented as #respondents/#patients.

**Table S2a. Unadjusted Associations between Patient Characteristics and Separate Family Satisfaction Items<sup>a</sup>, Part 1**

| Outcome                                  | Female         |        |              | Age            |        |       | Hours in ICU   |                  |                  |
|------------------------------------------|----------------|--------|--------------|----------------|--------|-------|----------------|------------------|------------------|
|                                          | n <sup>b</sup> | b      | p            | n <sup>b</sup> | b      | p     | n <sup>b</sup> | b                | p                |
| Concern and caring toward patient        | 1042/888       | -0.049 | 0.536        | 1042/888       | 0.003  | 0.277 | 1040/887       | 0.000            | 0.726            |
| Pain management                          | 984/841        | -0.152 | 0.058        | 984/841        | 0.002  | 0.521 | 983/841        | 0.000            | 0.939            |
| Breathlessness management                | 905/775        | -0.184 | <b>0.024</b> | 904/774        | -0.002 | 0.417 | 903/774        | 0.000            | 0.431            |
| Agitation management                     | 945/816        | -0.002 | 0.980        | 944/815        | 0.001  | 0.572 | 943/815        | 0.000            | 0.672            |
| Atmosphere of the ICU                    | 1047/893       | -0.135 | 0.080        | 1047/893       | 0.004  | 0.095 | 1045/892       | 0.000            | 0.329            |
| Consideration of family needs            | 1038/886       | -0.148 | <b>0.046</b> | 1038/886       | 0.004  | 0.108 | 1036/885       | 0.000            | 0.781            |
| Emotional support                        | 1006/862       | -0.136 | 0.072        | 1006/862       | 0.004  | 0.139 | 1004/861       | 0.000            | 0.906            |
| Opportunity to be present at bedside     | 1048/893       | -0.004 | 0.962        | 1048/893       | 0.003  | 0.268 | 1046/892       | 0.000            | 0.367            |
| Ease of getting information              | 1043/888       | -0.071 | 0.340        | 1043/888       | 0.003  | 0.278 | 1041/887       | 0.000            | 0.622            |
| Understanding of information             | 1042/887       | -0.032 | 0.672        | 1042/887       | 0.001  | 0.834 | 1040/886       | 0.000            | 0.600            |
| Honesty of information                   | 1042/887       | -0.091 | 0.254        | 1042/887       | -0.001 | 0.656 | 1040/886       | 0.000            | 0.271            |
| Completeness of Information              |                |        |              |                |        |       |                |                  |                  |
| What was happening                       | 1038/884       | -0.087 | 0.247        | 1038/884       | 0.001  | 0.803 | 1036/883       | 0.000            | 0.305            |
| Why things were being done               | 1036/882       | -0.109 | 0.147        | 1036/882       | -0.002 | 0.397 | 1034/881       | 0.000            | 0.744            |
| Consistency of information               | 1030/880       | -0.082 | 0.266        | 1030/880       | 0.003  | 0.234 | 1028/879       | 0.000            | 0.978            |
| Overall quality of information           |                |        |              |                |        |       |                |                  |                  |
| By doctors                               | 1017/871       | -0.061 | 0.406        | 1017/871       | -0.001 | 0.763 | 1016/871       | 0.000            | 0.099            |
| By nurses                                | 1039/886       | -0.114 | 0.140        | 1039/886       | 0.000  | 0.871 | 1037/885       | 0.000            | 0.696            |
| Inclusion in decision-making processes   | 883/771        | -0.096 | 0.206        | 882/770        | 0.001  | 0.742 | 882/770        | 0.000            | 0.401            |
| Support during decision-making processes | 820/715        | 0.020  | 0.810        | 819/714        | -0.001 | 0.618 | 818/714        | 0.000            | 0.945            |
| Adequate time to have concerns addressed | 760/670        | 0.190  | 0.156        | 759/669        | 0.000  | 0.937 | 759/669        | 0.000            | 0.598            |
| Overall satisfaction with patient care   | 1032/879       | -0.107 | 0.185        | 1032/879       | 0.002  | 0.438 | 1029/877       | --- <sup>c</sup> | --- <sup>c</sup> |

- a All associations were tested with clustered single-predictor probit regression models (respondents nested under patients; outcomes defined as ordered categorical variables) estimated with weighted least squares with mean and variance adjustment (WLSMV). *P*-values (statistically significant values presented in boldface) were based on Wald’s test.
- b Sample with valid cases is presented as #respondents/#patients.
- c The joint distribution was too sparse to allow computation of this coefficient.

**Table S2b. Unadjusted Associations between Patient Characteristics and Separate Family Satisfaction Items<sup>a</sup>, Part 2**

| Outcome                                  | Received MV    |        |              | Apache Score   |                  |                  | SAP Score      |                  |                  |
|------------------------------------------|----------------|--------|--------------|----------------|------------------|------------------|----------------|------------------|------------------|
|                                          | n <sup>b</sup> | b      | p            | n <sup>b</sup> | b                | p                | n <sup>b</sup> | b                | p                |
| Concern and caring toward patient        | 1042/888       | 0.127  | 0.236        | 525/508        | 0.005            | 0.388            | 738/634        | 0.007            | <b>0.008</b>     |
| Pain management                          | 984/841        | -0.027 | 0.810        | 480/467        | 0.006            | 0.301            | 695/599        | 0.004            | 0.144            |
| Breathlessness management                | 904/774        | -0.049 | 0.697        | 440/428        | 0.004            | 0.553            | 630/546        | 0.004            | 0.138            |
| Agitation management                     | 944/815        | 0.114  | 0.352        | 470/459        | 0.001            | 0.922            | 666/582        | 0.004            | 0.139            |
| Atmosphere of the ICU                    | 1047/893       | 0.209  | 0.052        | 525/508        | 0.013            | <b>0.022</b>     | 743/637        | 0.009            | <b>0.000</b>     |
| Consideration of family needs            | 1038/886       | 0.172  | 0.104        | 519/502        | 0.018            | <b>0.001</b>     | 737/633        | 0.011            | <b>0.000</b>     |
| Emotional support                        | 1006/862       | 0.140  | 0.180        | 501/485        | 0.020            | <b>0.000</b>     | 712/613        | 0.009            | <b>0.000</b>     |
| Opportunity to be present at bedside     | 1048/893       | 0.079  | 0.486        | 525/508        | 0.007            | 0.232            | 743/637        | 0.008            | <b>0.003</b>     |
| Ease of getting information              | 1043/888       | 0.163  | 0.145        | 522/505        | 0.013            | <b>0.020</b>     | 739/633        | 0.007            | <b>0.005</b>     |
| Understanding of information             | 1042/887       | 0.276  | <b>0.011</b> | 523/506        | 0.012            | <b>0.040</b>     | 739/633        | 0.008            | <b>0.001</b>     |
| Honesty of information                   | 1042/887       | 0.202  | 0.060        | 523/506        | 0.014            | <b>0.014</b>     | 739/633        | 0.008            | <b>0.002</b>     |
| Completeness of Information              |                |        |              |                |                  |                  |                |                  |                  |
| What was happening                       | 1038/884       | 0.159  | 0.123        | 520/503        | 0.009            | 0.108            | 738/632        | 0.008            | <b>0.001</b>     |
| Why things were being done               | 1036/882       | 0.191  | 0.068        | 518/501        | 0.008            | 0.155            | 734/628        | 0.008            | <b>0.001</b>     |
| Consistency of information               | 1030/880       | 0.048  | 0.656        | 519/502        | 0.007            | 0.226            | 731/629        | 0.008            | <b>0.001</b>     |
| Overall quality of information           |                |        |              |                |                  |                  |                |                  |                  |
| By doctors                               | 1017/871       | 0.173  | 0.104        | 514/498        | 0.014            | <b>0.011</b>     | 720/621        | 0.009            | <b>0.000</b>     |
| By nurses                                | 1039/886       | 0.125  | 0.231        | 521/504        | 0.009            | 0.090            | 737/632        | 0.009            | <b>0.000</b>     |
| Inclusion in decision-making processes   | 882/770        | 0.061  | 0.572        | 451/436        | 0.018            | <b>0.001</b>     | 629/550        | 0.009            | <b>0.001</b>     |
| Support during decision-making processes | 820/715        | 0.009  | 0.942        | 415/400        | 0.013            | <b>0.046</b>     | 579/505        | 0.007            | <b>0.020</b>     |
| Adequate time to have concerns addressed | 759/669        | 0.010  | 0.960        | 382/369        | 0.006            | 0.582            | 531/470        | 0.003            | 0.621            |
| Overall satisfaction with patient care   | 1032/879       | 0.004  | 0.966        | 519/502        | --- <sup>c</sup> | --- <sup>c</sup> | 732/627        | --- <sup>c</sup> | --- <sup>c</sup> |

- a All associations were tested with clustered single-predictor probit regression models (respondents nested under patients; outcomes defined as ordered categorical variables) estimated with weighted least squares with mean and variance adjustment (WLSMV). *P*-values (statistically significant values presented in boldface) were based on Wald's test.
- b Sample with valid cases is presented as #respondents/#patients.
- c The joint distribution was too sparse to allow computation of this coefficient.

**Table S2c. Unadjusted Associations between Patient Characteristics and Separate Family Satisfaction Items<sup>a</sup>, Part 3**

| Outcome                                  | Death in ICU   |        |              | Reason for Discharge |         |        |        |              |
|------------------------------------------|----------------|--------|--------------|----------------------|---------|--------|--------|--------------|
|                                          | n <sup>b</sup> | b      | p            | n <sup>b</sup>       | Planned | Death  | Other  | p            |
|                                          |                |        |              |                      | b       | b      | b      |              |
| Concern and caring toward patient        | 1070/915       | 0.060  | 0.547        | 1043/889             | 0.000   | 0.069  | 0.140  | 0.589        |
| Pain management                          | 1008/864       | 0.060  | 0.542        | 982/839              | 0.000   | 0.073  | 0.167  | 0.422        |
| Breathlessness management                | 928/797        | 0.002  | 0.984        | 904/774              | 0.000   | 0.028  | 0.271  | 0.168        |
| Agitation management                     | 970/840        | 0.103  | 0.269        | 944/815              | 0.000   | 0.114  | 0.166  | 0.307        |
| Atmosphere of the ICU                    | 1075/920       | 0.099  | 0.293        | 1048/894             | 0.000   | 0.088  | 0.049  | 0.637        |
| Consideration of family needs            | 1066/913       | 0.191  | <b>0.036</b> | 1039/887             | 0.000   | 0.184  | 0.061  | 0.135        |
| Emotional support                        | 1034/889       | 0.312  | <b>0.001</b> | 1007/863             | 0.000   | 0.315  | 0.163  | <b>0.003</b> |
| Opportunity to be present at bedside     | 1076/920       | 0.052  | 0.553        | 1049/894             | 0.000   | 0.063  | 0.182  | 0.436        |
| Ease of getting information              | 1071/915       | 0.145  | 0.126        | 1044/889             | 0.000   | 0.136  | 0.026  | 0.366        |
| Understanding of information             | 1070/914       | 0.143  | 0.134        | 1043/888             | 0.000   | 0.142  | 0.093  | 0.307        |
| Honesty of information                   | 1070/914       | 0.080  | 0.383        | 1043/888             | 0.000   | 0.068  | 0.003  | 0.762        |
| Completeness of Information              |                |        |              |                      |         |        |        |              |
| What was happening                       | 1065/910       | 0.156  | 0.075        | 1039/885             | 0.000   | 0.145  | 0.007  | 0.264        |
| Why things were being done               | 1063/908       | 0.185  | <b>0.037</b> | 1037/883             | 0.000   | 0.187  | 0.173  | 0.076        |
| Consistency of information               | 1057/906       | 0.115  | 0.171        | 1031/881             | 0.000   | 0.115  | 0.212  | 0.167        |
| Overall quality of information           |                |        |              |                      |         |        |        |              |
| By doctors                               | 1045/898       | 0.202  | <b>0.017</b> | 1018/872             | 0.000   | 0.186  | -0.004 | 0.090        |
| By nurses                                | 1067/913       | 0.140  | 0.118        | 1040/887             | 0.000   | 0.140  | 0.147  | 0.240        |
| Inclusion in decision-making processes   | 906/793        | 0.289  | <b>0.001</b> | 883/771              | 0.000   | 0.274  | 0.054  | <b>0.012</b> |
| Support during decision-making processes | 839/734        | 0.261  | <b>0.006</b> | 822/717              | 0.000   | 0.234  | -0.095 | <b>0.029</b> |
| Adequate time to have concerns addressed | 776/686        | -0.116 | 0.414        | 762/672              | 0.000   | -0.194 | -0.634 | <b>0.005</b> |
| Overall satisfaction with patient care   | 1060/906       | 0.229  | <b>0.013</b> | 1033/880             | 0.000   | 0.220  | -0.020 | 0.054        |

- a All associations were tested with clustered probit regression models (respondents nested under patients; outcomes defined as ordered categorical variables) estimated with weighted least squares with mean and variance adjustment (WLSMV). The models with death in the ICU as a predictor were single-predictor models; those with reason for discharge as a predictor were two-predictor models, with death and other discharge reasons modeled as dummy indicators, and using planned discharge as the reference category. *P*-values (statistically significant values presented in boldface) were based on Wald's test.
- b Sample with valid cases is presented as #respondents/#patients.

**Table S2d. Unadjusted Associations between Patient Characteristics and Separate Family Satisfaction Items<sup>a</sup>, Part 4**

| Outcome                                  | n <sup>b</sup> | Treatment Limitations |        |        | p     |
|------------------------------------------|----------------|-----------------------|--------|--------|-------|
|                                          |                | Full Tx               | Ltd Tx | Tx W/D |       |
| Concern and caring toward patient        | 1004/850       | 0.000                 | -0.138 | -0.015 | 0.498 |
| Pain management                          | 947/804        | 0.000                 | -0.104 | 0.024  | 0.655 |
| Breathlessness management                | 870/740        | 0.000                 | -0.107 | -0.031 | 0.662 |
| Agitation management                     | 909/780        | 0.000                 | -0.120 | 0.015  | 0.584 |
| Atmosphere of the ICU                    | 1009/855       | 0.000                 | -0.058 | 0.103  | 0.584 |
| Consideration of family needs            | 1000/848       | 0.000                 | -0.113 | 0.148  | 0.214 |
| Emotional support                        | 968/824        | 0.000                 | -0.020 | 0.255  | 0.080 |
| Opportunity to be present at bedside     | 1010/855       | 0.000                 | -0.059 | 0.065  | 0.713 |
| Ease of getting information              | 1005/850       | 0.000                 | -0.084 | 0.063  | 0.620 |
| Understanding of information             | 1004/849       | 0.000                 | -0.043 | 0.026  | 0.898 |
| Honesty of information                   | 1004/849       | 0.000                 | -0.063 | -0.032 | 0.850 |
| Completeness of Information              |                |                       |        |        |       |
| What was happening                       | 1000/846       | 0.000                 | 0.111  | 0.070  | 0.571 |
| Why things were being done               | 998/844        | 0.000                 | -0.069 | 0.101  | 0.527 |
| Consistency of information               | 992/842        | 0.000                 | -0.101 | -0.029 | 0.669 |
| Overall quality of information           |                |                       |        |        |       |
| By doctors                               | 980/834        | 0.000                 | 0.030  | 0.158  | 0.330 |
| By nurses                                | 1001/848       | 0.000                 | -0.161 | 0.079  | 0.241 |
| Inclusion in decision-making processes   | 846/734        | 0.000                 | 0.078  | 0.175  | 0.259 |
| Support during decision-making processes | 790/685        | 0.000                 | 0.022  | 0.194  | 0.254 |
| Adequate time to have concerns addressed | 734/644        | 0.000                 | 0.099  | -0.030 | 0.838 |
| Overall satisfaction with patient care   | 995/842        | 0.000                 | -0.074 | 0.181  | 0.210 |

- a All associations were tested with two-predictor clustered probit regression models (dummy indicators for limited and withdrawn treatment, with full treatment serving as the reference category; respondents nested under patients; outcomes defined as ordered categorical variables) estimated with weighted least squares with mean and variance adjustment (WLSMV). *P*-values (statistically significant values presented in boldface) were based on Wald's test.
- b Sample with valid cases is presented as #respondents/#patients.

**Table S2e. Unadjusted Associations between Patient Characteristics and Separate Family Satisfaction Items<sup>a</sup>, Part 5**

| Outcome                                  | n <sup>b</sup> | Specialties |        |        |        |        |        | p            |
|------------------------------------------|----------------|-------------|--------|--------|--------|--------|--------|--------------|
|                                          |                | Med         | Surg   | Trauma | Onc    | Neuro  | Other  |              |
| Concern and caring toward patient        | 1043/889       | 0.000       | -0.001 | 0.478  | 0.819  | 0.163  | 0.424  | <b>0.044</b> |
| Pain management                          | 985/842        | 0.000       | -0.121 | 0.404  | 0.359  | -0.178 | 0.966  | <b>0.012</b> |
| Breathlessness management                | 905/775        | 0.000       | -0.263 | 0.154  | 0.384  | -0.223 | 0.784  | <b>0.002</b> |
| Agitation management                     | 945/816        | 0.000       | -0.152 | 0.450  | 0.472  | -0.043 | 1.087  | <b>0.003</b> |
| Atmosphere of the ICU                    | 1048/894       | 0.000       | -0.118 | 0.389  | 0.238  | -0.232 | 0.664  | 0.064        |
| Consideration of family needs            | 1039/887       | 0.000       | -0.135 | 0.092  | 0.438  | -0.027 | 0.154  | 0.253        |
| Emotional support                        | 1007/863       | 0.000       | -0.158 | 0.382  | 0.578  | -0.089 | 0.430  | <b>0.040</b> |
| Opportunity to be present at bedside     | 1049/894       | 0.000       | -0.173 | 0.137  | 0.223  | -0.189 | 0.301  | 0.139        |
| Ease of getting information              | 1044/889       | 0.000       | -0.044 | 0.217  | 0.205  | -0.041 | 0.019  | 0.872        |
| Understanding of information             | 1043/888       | 0.000       | -0.120 | 0.316  | 0.122  | -0.201 | 0.269  | 0.352        |
| Honesty of information                   | 1043/888       | 0.000       | -0.162 | -0.068 | 0.613  | 0.073  | 0.633  | <b>0.029</b> |
| Completeness of Information              |                |             |        |        |        |        |        |              |
| What was happening                       | 1039/885       | 0.000       | -0.060 | -0.009 | 0.334  | -0.100 | 0.621  | 0.394        |
| Why things were being done               | 1037/883       | 0.000       | -0.104 | 0.208  | 0.386  | -0.059 | 0.591  | 0.206        |
| Consistency of information               | 1031/881       | 0.000       | -0.125 | -0.198 | 0.545  | -0.168 | 0.337  | 0.084        |
| Overall quality of information           |                |             |        |        |        |        |        |              |
| By doctors                               | 1018/872       | 0.000       | -0.148 | 0.054  | 0.621  | 0.029  | -0.027 | <b>0.009</b> |
| By nurses                                | 1040/887       | 0.000       | -0.059 | -0.042 | 0.730  | -0.128 | 0.777  | <b>0.029</b> |
| Inclusion in decision-making processes   | 883/771        | 0.000       | -0.176 | 0.115  | 0.298  | -0.103 | 0.204  | 0.201        |
| Support during decision-making processes | 820/715        | 0.000       | -0.280 | 0.152  | 0.480  | -0.194 | 0.617  | <b>0.004</b> |
| Adequate time to have concerns addressed | 760/670        | 0.000       | -0.027 | 0.012  | -0.173 | -0.325 | -0.586 | 0.731        |
| Overall satisfaction with patient care   | 1033/880       | 0.000       | -0.136 | 0.115  | 0.502  | -0.226 | 0.634  | 0.078        |

- a All associations were tested with five-predictor clustered probit regression models (dummy indicators for five specialties, with medical serving as the reference category; respondents nested under patients; outcomes defined as ordered categorical variables) estimated with weighted least squares with mean and variance adjustment (WLSMV). *P*-values (statistically significant values presented in boldface) were based on Wald's test.
- b Sample with valid cases is presented as #respondents/#patients.



**Table S2f. Unadjusted Associations between Patient Characteristics and Separate Family Satisfaction Items<sup>a</sup>, Part 6**

| Outcome                                  | n <sup>b</sup> | Primary Reason for Admit |        |        |        |        |       |        | p            |
|------------------------------------------|----------------|--------------------------|--------|--------|--------|--------|-------|--------|--------------|
|                                          |                | Resp                     | Cardio | Gastro | Trauma | Sepsis | Metab | Other  |              |
| Concern and caring toward patient        | 1042/888       | 0.000                    | 0.030  | 0.099  | 0.073  | 0.136  | 0.187 | 0.327  | 0.804        |
| Pain management                          | 984/841        | 0.000                    | 0.003  | 0.193  | 0.121  | 0.076  | 0.111 | 0.345  | 0.770        |
| Breathlessness management                | 904/774        | 0.000                    | -0.031 | -0.135 | -0.082 | 0.010  | 0.405 | 0.559  | 0.229        |
| Agitation management                     | 944/815        | 0.000                    | 0.071  | -0.052 | 0.045  | 0.127  | 0.298 | 0.484  | 0.500        |
| Atmosphere of the ICU                    | 1047/893       | 0.000                    | 0.129  | 0.134  | 0.049  | 0.117  | 0.526 | 0.198  | 0.322        |
| Consideration of family needs            | 1038/886       | 0.000                    | 0.050  | 0.168  | -0.123 | 0.189  | 0.514 | 0.143  | 0.176        |
| Emotional support                        | 1006/862       | 0.000                    | 0.096  | 0.137  | -0.055 | 0.178  | 0.639 | 0.139  | 0.109        |
| Opportunity to be present at bedside     | 1048/893       | 0.000                    | 0.052  | 0.084  | -0.037 | 0.092  | 0.715 | 0.234  | 0.080        |
| Ease of getting information              | 1043/888       | 0.000                    | 0.021  | 0.204  | 0.046  | 0.054  | 0.440 | 0.116  | 0.579        |
| Understanding of information             | 1042/887       | 0.000                    | 0.024  | 0.124  | 0.134  | 0.075  | 0.524 | 0.277  | 0.276        |
| Honesty of information                   | 1042/887       | 0.000                    | -0.048 | 0.250  | 0.083  | 0.034  | 0.709 | 0.175  | 0.060        |
| Completeness of Information              |                |                          |        |        |        |        |       |        |              |
| What was happening                       | 1038/884       | 0.000                    | -0.056 | 0.116  | 0.065  | 0.052  | 0.599 | 0.173  | 0.168        |
| Why things were being done               | 1036/882       | 0.000                    | 0.046  | 0.109  | 0.170  | 0.093  | 0.284 | 0.405  | 0.614        |
| Consistency of information               | 1030/880       | 0.000                    | -0.041 | 0.104  | -0.092 | 0.053  | 0.845 | 0.321  | <b>0.003</b> |
| Overall quality of information           |                |                          |        |        |        |        |       |        |              |
| By doctors                               | 1017/871       | 0.000                    | -0.026 | 0.123  | 0.014  | 0.068  | 0.787 | 0.269  | <b>0.026</b> |
| By nurses                                | 1039/886       | 0.000                    | -0.005 | 0.125  | -0.039 | 0.013  | 0.437 | 0.170  | 0.502        |
| Inclusion in decision-making processes   | 883/771        | 0.000                    | -0.126 | 0.096  | -0.153 | 0.020  | 0.269 | 0.125  | 0.319        |
| Support during decision-making processes | 820/715        | 0.000                    | -0.047 | 0.087  | -0.221 | 0.054  | 0.659 | 0.410  | 0.063        |
| Adequate time to have concerns addressed | 760/670        | 0.000                    | 0.076  | -0.098 | 0.276  | 0.138  | 0.003 | -0.127 | 0.931        |
| Overall satisfaction with patient care   | 1032/879       | 0.000                    | -0.040 | 0.208  | -0.091 | 0.012  | 0.361 | 0.279  | 0.307        |

a All associations were tested with six-predictor clustered probit regression models (dummy indicators for six reasons, with respiratory condition serving as the reference category; respondents nested under patients; outcomes defined as ordered categorical variables) estimated with weighted least squares with mean and variance adjustment (WLSMV). *P*-values (statistically significant values presented in boldface) were based on Wald’s test.

b Sample with valid cases is presented as #respondents/#patients.

### Domains of family satisfaction within Denmark and the Netherlands

The first step in investigating the structure of the euroFS-ICU items was to assign each of the 20 items *a priori* to one of the four conceptual domains (Communication, Empathy, Patient care and Symptom Management and Decision-making) that have been identified in the North American version of the instrument (Table S3).

**Table S3. Four-Domain Twenty-Indicator Conceptual Model of Family Satisfaction with the ICU Experience**

| Indicator                                        | Communication | Empathy | Patient Care and Symptom Management | Decision-Making |
|--------------------------------------------------|---------------|---------|-------------------------------------|-----------------|
| Ease of getting information                      |               |         | X                                   | ----            |
| Provision of understandable explanations         |               |         | X                                   | ----            |
| Honesty of information                           |               |         | X                                   | ----            |
| Information about what was happening             |               |         | X                                   | ----            |
| Information about why things were being done     |               |         | X                                   | ----            |
| Consistency of information                       |               |         | X                                   | ----            |
| Overall quality of information from doctors      |               |         | X                                   | ----            |
| Overall quality of information from nurses       |               |         | X                                   | ----            |
| ICU atmosphere: appreciation for family presence |               |         | ----                                | X               |
| Consideration of family needs                    |               |         | ----                                | X               |
| Emotional support of family                      |               |         | ----                                | X               |
| Opportunity to be present at bedside             |               |         | ----                                | X               |
| Overall care patient received                    |               |         | ----                                | X               |
| Concern and caring for patient                   |               |         | ----                                | X               |
| Pain management                                  |               |         | ----                                | X               |
| Breathlessness management                        |               |         | ----                                | X               |
| Agitation management                             |               |         | ----                                | X               |
| Inclusion in decision-making processes           |               |         | ----                                | X               |
| Support during decision-making processes         |               |         | ----                                | X               |
| Time to have decision-making concerns addressed  |               |         | ----                                | X               |

To achieve acceptable fit to data from the combined Danish and Dutch samples, we eliminated nine items (five from the communication domain, one from empathy, two from patient care and symptom management, and one from decision-making), producing a four-domain model with good fit to the observed data from the combined countries (Table 3). The “patient care and symptom management” factor simplified to a factor related solely to symptom management, with the remaining factors appropriately reflecting the hypothesized domains. The test of fit showed non-significant misfit to the observed data ( $\chi^2 = 18.283$ , 17 df,  $p = 0.3712$ ), and all loadings on the primary hypothesized factors were strong. Correlations between factors were modest enough to indicate that the factors were non-redundant.

A four-factor eleven-indicator exploratory factor analysis model showed acceptable fit to the merged data from Denmark and the Netherlands. This model also showed acceptable fit to data from each of the countries, considered separately: Denmark ( $\chi^2 = 21.138$ , 17 df,  $p = 0.2202$ ) and Netherlands ( $\chi^2 = 22.332$ , 17 df,  $p = 0.1723$ ). However, in Denmark the primary loading of the “inclusion in decision-making” item was reduced to an undesirably low level, and its cross-loading on the communication factor became quite high (Table S3). Four other cross-loadings were also statistically significant, although modest in magnitude. The model also had undesirable characteristics in the Netherlands sample. The primary loading of the “appreciation of family presence” item became undesirably low, and it had a high cross-loading on the communication factor. Four other cross-loadings were also statistically significant, although smaller in magnitude. Loadings for some indicators were similar in the two countries, but others showed considerable between-country variability, suggesting that the contribution of some of individual items to their primary domains depended upon country.

### **Tests for Model Similarity between Countries**

Although analysis of this model within each of the countries produced acceptable fit to the data based on the chi-square test, details of the country-specific models suggested that the countries were dissimilar in their pattern of loadings (Supplementary Table S4), with considerable between-country variability in the magnitudes of indicator loadings on the factors, and with large cross-loadings for some items occurring in one country, but not the other. Although removal of indicators that behaved differently between countries yielded a model that fit the merged samples adequately (Supplementary Table S5), and a still simpler model fit the individual samples (Supplementary Table S6), when the additional requirement for scalar measurement invariance was imposed, even this very simple (three-factor six-indicator) model failed the chi-square test.

**Table S4. Exploratory Factor Analysis, Four-Factor Eleven-Indicator Model, Stratified by Country: Indicator Loadings and Factor Correlations**

| Indicator                                  | Communication |               | Empathy       |               | Symptom Management |               | Decision-Making |               |
|--------------------------------------------|---------------|---------------|---------------|---------------|--------------------|---------------|-----------------|---------------|
|                                            | DK            | NL            | DK            | NL            | DK                 | NL            | DK              | NL            |
| Provision of understandable explanations   | <b>0.837*</b> | <b>0.880*</b> | -0.007        | 0.035         | 0.044              | -0.038        | 0.001           | 0.036         |
| Honesty of information                     | <b>0.756*</b> | <b>0.812*</b> | 0.020         | 0.000         | 0.013              | 0.017         | 0.059           | 0.089         |
| Overall quality of information from nurses | <b>0.757*</b> | <b>0.760*</b> | 0.144*        | 0.021         | 0.021              | 0.104*        | 0.000           | 0.020         |
| Appreciation for family presence           | 0.106*        | 0.294*        | <b>0.796*</b> | <b>0.584*</b> | 0.031              | 0.160*        | -0.034          | -0.057        |
| Consideration of family needs              | -0.009        | 0.074         | <b>0.984*</b> | <b>0.847*</b> | -0.040             | -0.028        | 0.016           | 0.151         |
| Emotional support of family                | 0.003         | -0.056*       | <b>0.752*</b> | <b>0.728*</b> | 0.050              | 0.021         | 0.136*          | 0.277         |
| Pain management                            | -0.018        | 0.086         | 0.023         | 0.158*        | <b>0.825*</b>      | <b>0.725*</b> | 0.043           | -0.004        |
| Breathlessness management                  | 0.104         | 0.033         | -0.046        | -0.068        | <b>0.797*</b>      | <b>0.939*</b> | 0.006           | 0.013         |
| Agitation management                       | -0.003        | -0.063        | 0.137*        | 0.054         | <b>0.766*</b>      | <b>0.860*</b> | -0.012          | 0.076         |
| Inclusion in decision-making processes     | 0.375*        | 0.022         | -0.008        | 0.014         | -0.050             | -0.002        | <b>0.572*</b>   | <b>0.870*</b> |
| Support during decision-making processes   | 0.005         | 0.111         | 0.027         | 0.022         | 0.068              | 0.132         | <b>1.001*</b>   | <b>0.714*</b> |
| Factor Correlations                        |               |               |               |               |                    |               |                 |               |
| Communication                              | ----          | ----          |               |               |                    |               |                 |               |
| Empathy                                    | 0.724*        | 0.757*        | ----          | ----          |                    |               |                 |               |
| Symptom Management                         | 0.656*        | 0.723*        | 0.642*        | 0.723*        | ----               | ----          |                 |               |
| Decision-Making support                    | 0.680*        | 0.822*        | 0.604         | 0.673*        | 0.550*             | 0.725*        | ----            | ----          |

\* = statistically significant at or beyond  $p=0.05$ .

### Constraining non-primary loadings to zero

The presence of statistically significant cross-loadings in the EFA models made it seem likely that a CFA model, which constrains cross-loadings to zero, would show significant misfit to the observed data. As expected, the CFA model did not fit the merged data from the two countries:  $\chi^2 = 120.173$ , 38 df,  $p = 0.0000$ . Removal of additional indicators to improve fit produced a three-factor seven-indicator model with acceptable fit to data from the combined countries (Table 6):  $\chi^2 = 15.057$ , 11 df,  $p = 0.1799$ .

**Table S5. Confirmatory Factor Analysis, Three-Factor Seven-Indicator Model, Merged Data from Denmark and the Netherlands (n=1,077): Standardized Indicator Loadings and Factor Correlations**

| Indicator                                | Communication       | Empathy      | Symptom Management |
|------------------------------------------|---------------------|--------------|--------------------|
| Provision of understandable explanations | <b>0.870</b>        |              |                    |
| Honesty of information                   | <b>0.880</b>        |              |                    |
| Appreciation for family presence         |                     | <b>0.926</b> |                    |
| Consideration of family needs            |                     | <b>0.937</b> |                    |
| Pain management                          |                     |              | <b>0.901</b>       |
| Breathlessness management                |                     |              | <b>0.880</b>       |
| Agitation management                     |                     |              | <b>0.886</b>       |
|                                          | Factor Correlations |              |                    |
| Communication                            | ----                |              |                    |
| Empathy                                  | 0.825               | ----         |                    |
| Symptom Management                       | 0.758               | 0.771        | ----               |

Although this model provided adequate fit to the Danish sample when evaluated separately ( $\chi^2 = 12.273$ , 11 df,  $p = 0.3435$ ), it showed significant misfit to data from the Netherlands ( $\chi^2 = 40.824$ , 11 df,  $p = 0.0000$ ). An altered three-factor six-indicator model showed acceptable fit in both countries (Table S6).

**Table S6. Confirmatory Factor Analysis, Three-Factor Seven-Indicator Model, Stratified by Country: Standardized Indicator Loadings and Factor Correlations**

| Indicator                                  | Communication |              | Empathy             |              | Symptom Management |              |
|--------------------------------------------|---------------|--------------|---------------------|--------------|--------------------|--------------|
|                                            | DK            | NL           | DK                  | NL           | DK                 | NL           |
| Honesty of information                     | <b>0.799</b>  | <b>0.888</b> |                     |              |                    |              |
| Overall quality of information from nurses | <b>0.904</b>  | <b>0.880</b> |                     |              |                    |              |
| Consideration of family needs              |               |              | <b>0.918</b>        | <b>0.983</b> |                    |              |
| Emotional support of family                |               |              | <b>0.911</b>        | <b>0.913</b> |                    |              |
| Breathlessness management                  |               |              |                     |              | <b>0.816</b>       | <b>0.900</b> |
| Agitation management                       |               |              |                     |              | <b>0.869</b>       | <b>0.932</b> |
|                                            |               |              | Factor Correlations |              |                    |              |
| Communication                              | ----          | ----         |                     |              |                    |              |
| Empathy                                    | 0.795         | 0.845        | ----                | ----         |                    |              |
| Symptom Management                         | 0.729         | 0.772        | 0.714               | 0.774        | ----               | ----         |

Fit statistics within countries were as follows: for Denmark,  $\chi^2 = 8.513$ , 6 df,  $p = 0.2029$ ; for the Netherlands,  $\chi^2 = 10.048$ , 6 df,  $p = 0.1226$ . However, when the additional requirement for scalar measurement invariance was imposed (constraining the indicator loadings and thresholds to equality between countries), the model showed significant misfit:  $\chi^2 = 60.340$ , 30 df,  $p = 0.0008$ .

### Correcting A Source of Model Misspecification

All of the models tested with these data use a methodology that is widely reported for similar instruments. However, it is based on an important type of model misspecification: viz., the modeling of factor indicators as reflective (or effect) indicators, when they should be modeled as causal indicators. Reflective indicators are caused by the underlying construct and are expected to rise and fall with changes in the underlying construct. In contrast, the direction of causation is reversed with causal indicators; the indicators contribute to the underlying construct, and it is not necessary that all of them rise and fall in harmony.

Modeling a construct that is measured solely with causal indicators requires that there be at least two additional variables that can be used as outcomes of the construct. Ideally, these would be reflective indicators, but they may alternatively be more distal outcomes of the construct. The euroFS-ICU includes only one hypothesized domain for which there are, arguably, reflective indicators: the “Communication” domain. This conceptual domain includes eight items: ease of getting information, provision of understandable explanations, honesty of information, information about what was happening, information about why things were being done, consistency of information, overall quality of information from doctors, and overall quality of information from nurses. The last two items in the list might reasonably be defined as reflective indicators, with the remaining six items serving as causal indicators.

To test this model, we first measured the domain with all eight indicators (six causal and two reflective) using the merged data from Denmark and the Netherlands. Although the eight-indicator model showed significant misfit, removal of the “consistency of information” indicator produced a model with good fit to the merged data:  $p$ -value for  $\chi^2$  test of fit = 0.3869. The model also fit the data from two countries, considered separately:  $p=0.5871$  for Denmark, and  $p=0.1908$  for the Netherlands (Figure 1).

## **Discussion (enlarged)**

Although exploratory factor analyses identified a set of four domains underlying family satisfaction, based on a subset of 11 indicators, the indicators behaved differently in the two countries, and when the model was simplified to the extent required to produce “pure” factors (i.e., factors whose component indicators had no cross-loadings) that fit the separate data from the two countries, the model retained very few indicators from the original set of 20, and it failed to fit the data when between-country measurement invariance was imposed. The initial fit of the four-factor EFA to the merged data suggested that the items in the euroFS-ICU instrument do not measure a unidimensional construct representing overall family satisfaction, and our subsequent failure to identify a multi-factor model in which the indicators behaved similarly between countries suggested that our model was misspecified. We posited that an important misspecification related to our definition of the component indicators as reflective indicators (i.e., indicators that are caused by, and reflect, a construct and that all rise and fall as the underlying construct rises and falls), when most of the variables in this instrument function conceptually as causal indicators of their respective constructs (i.e., variables that contribute to, rather than reflect, the construct). Analysis of the single construct (satisfaction with communication) for which the euroFS-ICU instrument includes both causal and reflective indicators provided evidence in support of this hypothesis. Our findings suggest that use of a latent construct based on seven of the indicators measuring satisfaction with communication can be validly used for the two countries, provided that the specified five indicators are modelled as causal indicators and the remaining two as reflective indicators. However, any attempt to model overall satisfaction or satisfaction in the remaining three domains does not meet these rigorous standards, given the absence of the requisite reflective indicators (or more distal outcomes) in the current instrument. Nor would it be advisable to construct composite measures (e.g., summed or mean scores) for these constructs, since the absence of a unidimensional construct may make it difficult to identify important changes or differences in scores.

Reflective indicators of overall satisfaction will increase the likelihood of identifying a unidimensional measure of the overall satisfaction construct that will exhibit between-country measurement invariance, thus providing a consistent meaning of “overall satisfaction” between countries, and allowing comparison of countries – and other groups – with regard to their average scores on the construct. Addition of reflective indicators for the hypothesized symptom management, empathy, and decision-making domains will allow testing those constructs with a combination of causal and reflective indicators, assess the extent to which they are invariant between countries, and evaluate their contributions to overall satisfaction.
